# Supplementary material
Source: PubMed Central journal article supplement (PMC2743465)

For Publication

Supporting Information:

Figure S1: ESI-MS analysis of X(AKA<sub>3</sub>KA)<sub>2</sub>X.

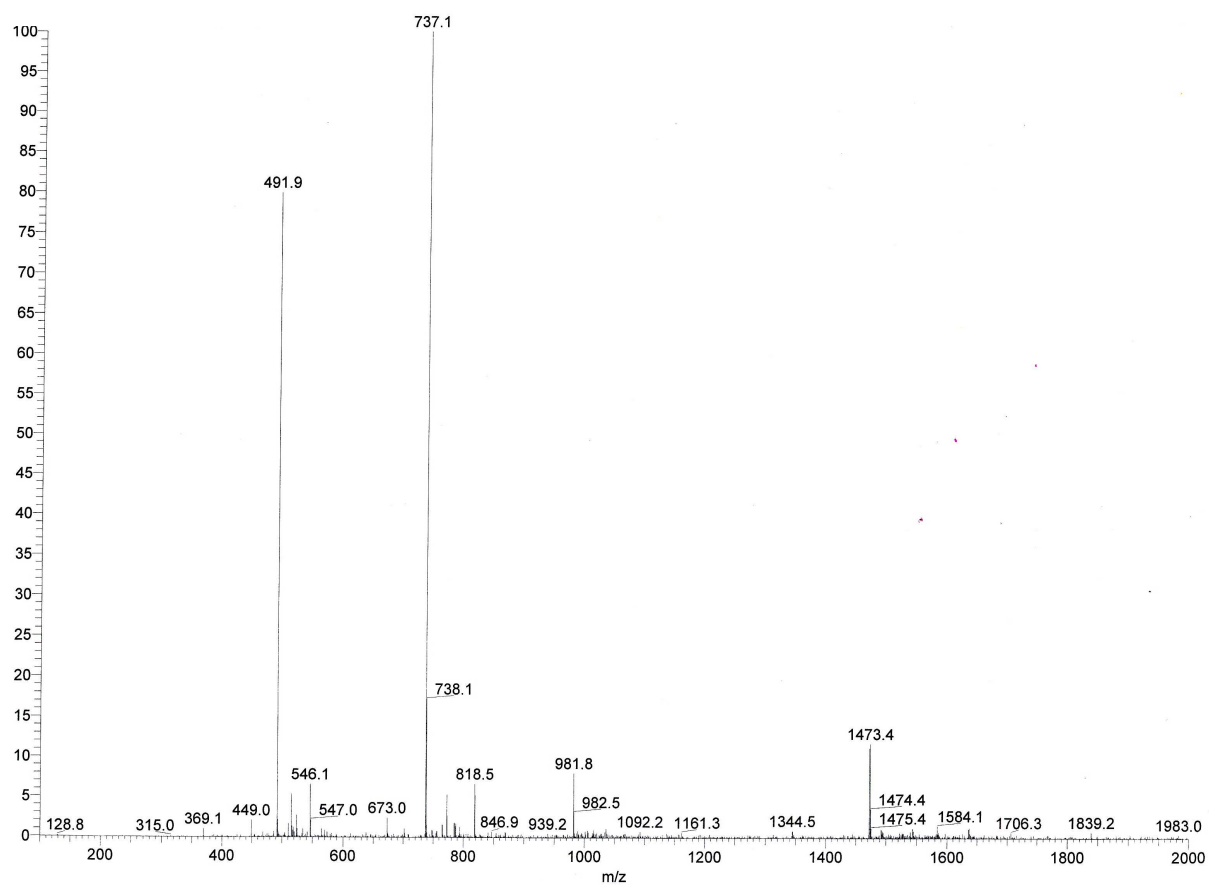

**Figure S2.** SEC analyses of PEG and peptide prepolymers. **Mobile** phase: PBS, pH=7.4, Refractive index detector.

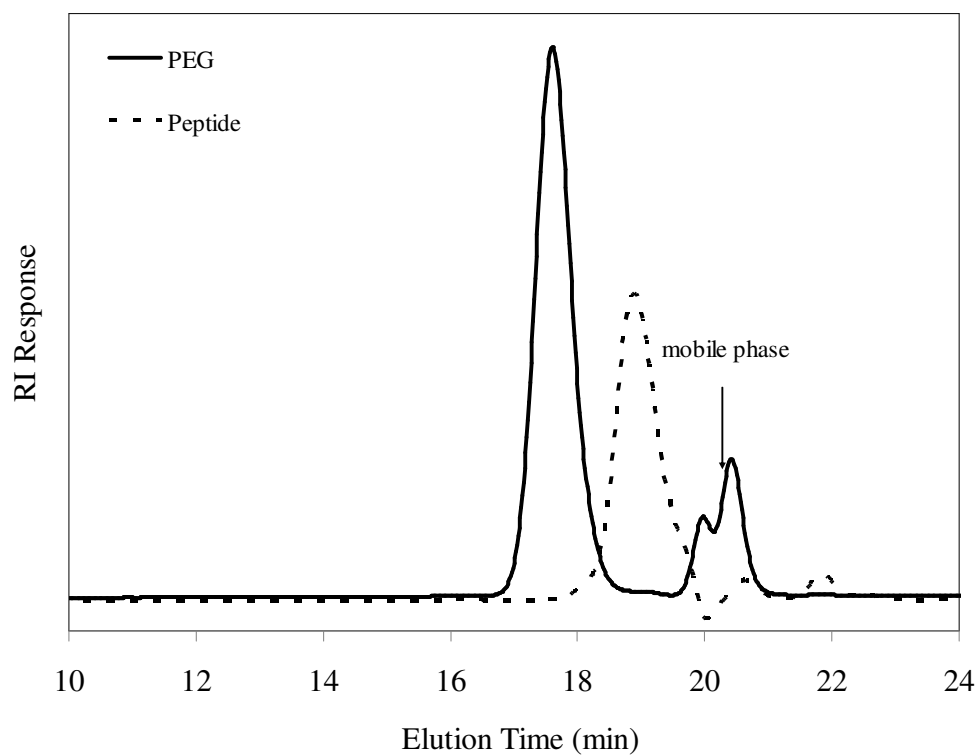

Supplement: NIHMS108303-supplement-Supporting_information.pdf [file NIHMS108303-supplement-Supporting_information.pdf]
